# Supplementary material for: Enhancing the Quality of Low-Alcohol Navel Orange Wine through Simultaneous Co-Fermentation Using Saccharomyces cerevisiae SC-125, Angel Yeast SY, and Lactiplantibacillus plantarum BC114
Source: MDPI journal article supplement (doi:10.3390/molecules29081781), 2024-04-14
Supplement: s1 [file s1]

Table S1 Sensory evaluation of navel orange wine

| Project                         | Scoring Criteria                                                | Score (Points) |
|---------------------------------|-----------------------------------------------------------------|----------------|
| Appearance<br>(Total Score: 10) | Clear and transparent, golden yellow, glossy                    | 9~10           |
|                                 | Clear and transparent, golden yellow, with no visible suspended | 7~8            |
|                                 | Clear, pale yellow, with a small amount of suspended particles  | 5~6            |
| Aroma<br>(Total Score: 30)      | Slightly cloudy, without gloss                                  | 0~4            |
|                                 | Harmoniously balanced fruity and wine aromas with elegance      | 26~30          |
|                                 | Fruity and wine aromas are good, still enjoyable                | 21~25          |
|                                 | Limited fruit and wine aromas, with no off-flavors              | 11~20          |
|                                 | Insufficient fruit aroma, or there may be off-flavors           | 0~10           |
| Flavor<br>(Total Score: 40)     | The wine is full-bodied, rich, pleasant, with subtle bitterness | 30~40          |
|                                 | The wine is smooth, soft, and refreshing with balanced          | 21~30          |
|                                 | Balanced wine, pure without impurities, with a stronger bitter  | 11~20          |
|                                 | Thin and unbalanced wine, overly bitter and astringent          | 0~10           |
|                                 | Typically perfect, uniquely styled, flawlessly elegant          | 18~20          |
| Typical<br>(Total Score: 40)    | Clearly typical, with a good style                              | 15~17          |
|                                 | Clearly typical, with a good style                              | 11~14          |
|                                 | Lacks typical characteristics, or has defects                   | 0~10           |

Table S2 Main aroma components of navel orange beverage before and after fermentation

| Category | Aroma components     | Navel orange juice | 1       | 2       | 3       |
|----------|----------------------|--------------------|---------|---------|---------|
| 1        | 1,4-pentanediol      | 0                  | 0       | 16.66   | 79.14   |
| 2        | N-hexanol            | 55.12              | 408.5   | 138.59  | 654.76  |
| 3        | Isobutanol           | 0                  | 125.77  | 104.49  | 141.39  |
| 4        | Isoamyl alcohol      | 0                  | 2443.68 | 2758.52 | 4143.61 |
| 5        | N-hexanol            | 0                  | 0       | 138.59  | 272.06  |
| 6        | Parsley alcohol      | 0                  | 117.99  | 363.89  | 414.86  |
| 7        | 2-Nonyl alcohol      | 0                  | 0       | 0       | 94.06   |
| 8        | Linalool             | 86.13              | 171.3   | 118.57  | 198.17  |
| 9        | Octanol              | 42.91              | 187.91  | 76.45   | 251.05  |
| 10       | 2,3-Butanediol       | 0                  | 117.77  | 0       | 124.12  |
| 11       | Terpinen-4-ol        | 0                  | 391.44  | 312.51  | 563.37  |
| 12       | $\alpha$ - Terpineol | 94.16              | 241.54  | 347.1   | 442.1   |
| 13       | Decanol              | 0                  | 30.92   | 6.48    | 64.34   |
| 14       | Citronellol          | 18.67              | 0       | 31.84   | 53.1    |

|    |                          |       |         |         |         |
|----|--------------------------|-------|---------|---------|---------|
| 15 | Parsley alcohol          | 0     | 98.48   | 194.49  | 134.52  |
| 16 | Benzyl alcohol           | 9.26  | 0       | 31.83   | 73.48   |
| 17 | Phenylethanol            | 26.09 | 1129.78 | 1152.68 | 2254.67 |
| 18 | Dodecanol                | 0     | 0       | 49.62   | 57.69   |
| 19 | Ethyl acetate            | 23.87 | 157.91  | 125.48  | 373.72  |
| 20 | Isoamyl acetate          | 0     | 80.159  | 45.72   | 224.15  |
| 21 | L (-) - Ethyl lactate    | 0     | 0       | 53.34   | 120.63  |
| 22 | Ethyl caproate           | 0     | 0       | 24.37   | 303.29  |
| 23 | Hexyl acetate            | 0     | 12.57   | 0.62    | 99.51   |
| 24 | Methyl octanoate         | 23.65 | 126.15  | 293.21  | 727.56  |
| 25 | Ethyl lactate            | 0     | 234.24  | 140.71  | 256.76  |
| 26 | Ethyl octanoate          | 0     | 486.78  | 1339.98 | 2798.72 |
| 27 | Methyl 2-furoate         | 0     | 53.13   | 33.72   | 15.79   |
| 28 | Ethyl decanoate          | 64.57 | 2975.05 | 3024.9  | 5498.81 |
| 29 | Phenylethyl acetate      | 0     | 1246.29 | 399.57  | 1129.7  |
| 30 | Ethyl laurate            | 0     | 0       | 0       | 3634.8  |
| 31 | Isoamyl decanoate        | 0     | 911.77  | 130.3   | 317.63  |
| 32 | Ethyl 3-phenylpropionate | 0     | 0       | 50.54   | 117.66  |
| 33 | Ethyl palmitate          | 0     | 134.65  | 97.17   | 308.51  |
| 34 | Isobutyric acid          | 0     | 46.64   | 49.86   | 136.76  |
| 35 | Pentanoic acid           | 0     | 0       | 265.48  | 764.86  |
| 36 | Octanoic acid            | 22.01 | 3763.01 | 3982.57 | 2859.33 |
| 37 | 9-decenoic acid          | 0     | 0       | 764.86  | 1108.43 |
| 38 | Lauric acid              | 0     | 546.53  | 783.62  | 1347.66 |
| 39 | 3-hydroxy-2-butanone     | 24.65 | 212.75  | 152.56  | 327.04  |
| 40 | 2-Octadecanone           | 0     | 0       | 56.22   | 29.38   |
| 41 | Benzaldehyde             | 7.78  | 226.21  | 356.54  | 537.86  |
| 42 | 2,4-di-tert-butyl        | 0     | 0       | 772.99  | 445.07  |
| 43 | 2-Nitropropane           | 0     | 42.36   | 65.44   | 154.65  |

Annotation: 1 represents SC-125 + BC114, 2 represents SY + BC114, 3 represents SC-125 + SY + BC114.

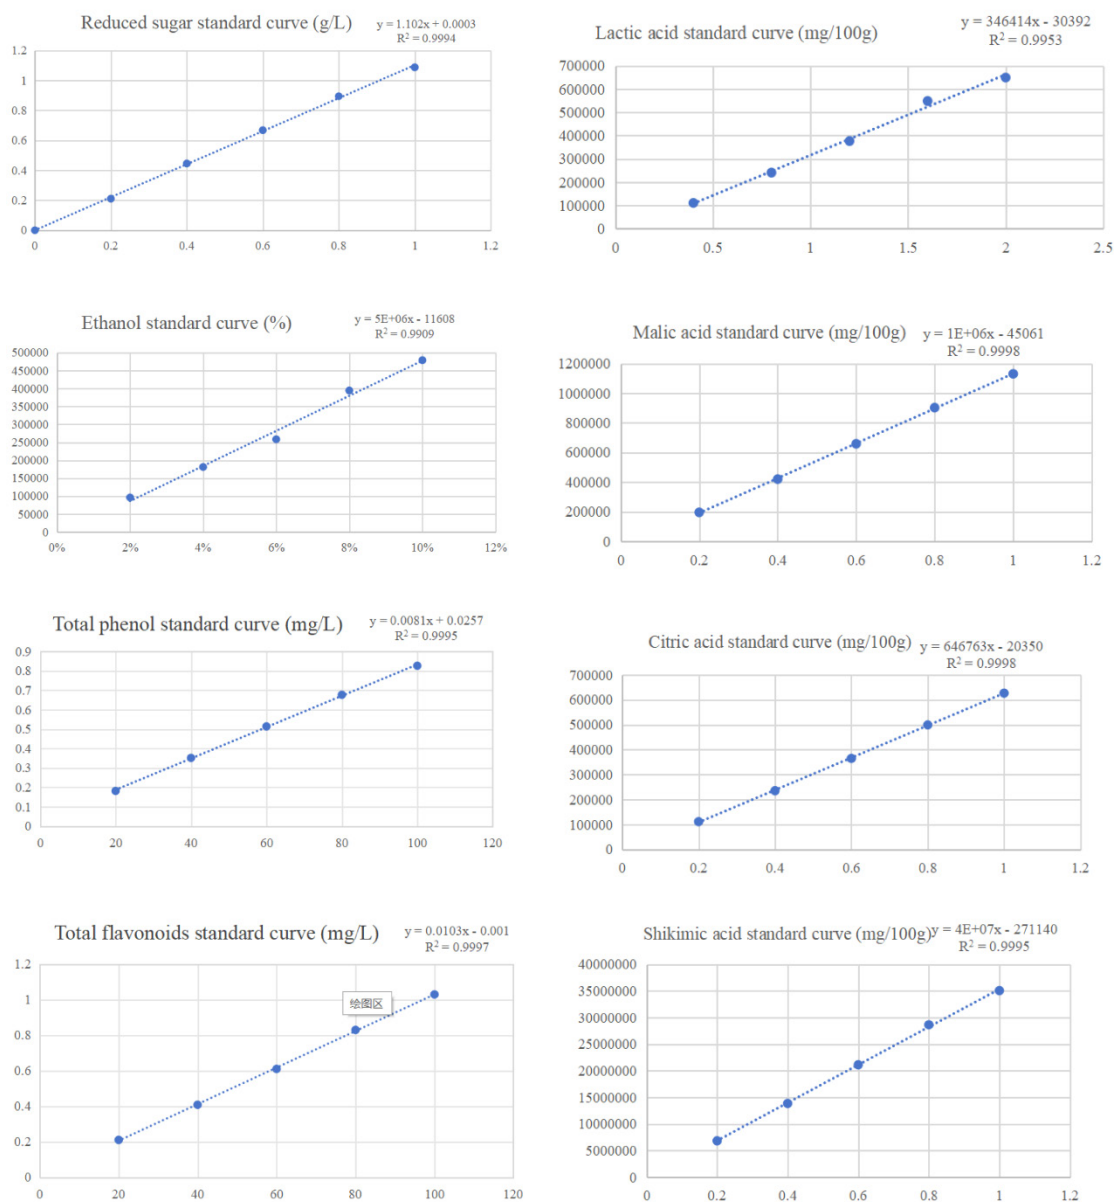

Figure S1 Standard curve
